# Supplementary material for: A turn-on fluorescent probe with high selectivity for Hg2+ and its applications in living cells
Source: Royal Society of Chemistry journal article supplement (doi:10.1039/d2ra02185d), 2022-01-01
Supplement: d2ra02185d1.pdf [file d2ra02185d1.pdf]

## A turn-on fluorescent probe with high selectivity for Hg<sup>2+</sup> and its applications in living cells

Bin Li<sup>a</sup>, Fuli Tian<sup>b\*</sup>, Yupeng Hua<sup>a</sup>

a. Department of Chemical Engineering, Ordos Institute of Technology, Ordos 017000, P.R. China.

b. College of Chemistry and Material Science, Hainan Vocational University of Science and Technology, Haikou 571126, P.R. China.

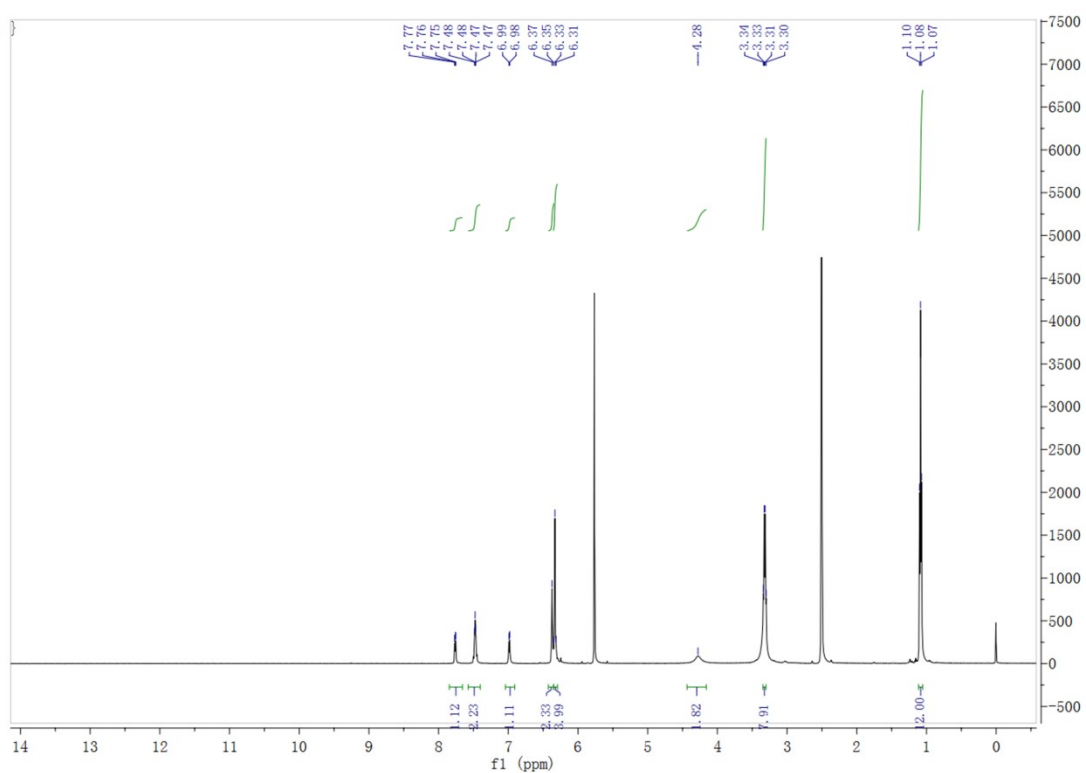

Fig. S1 The <sup>1</sup>H NMR of compound 1.

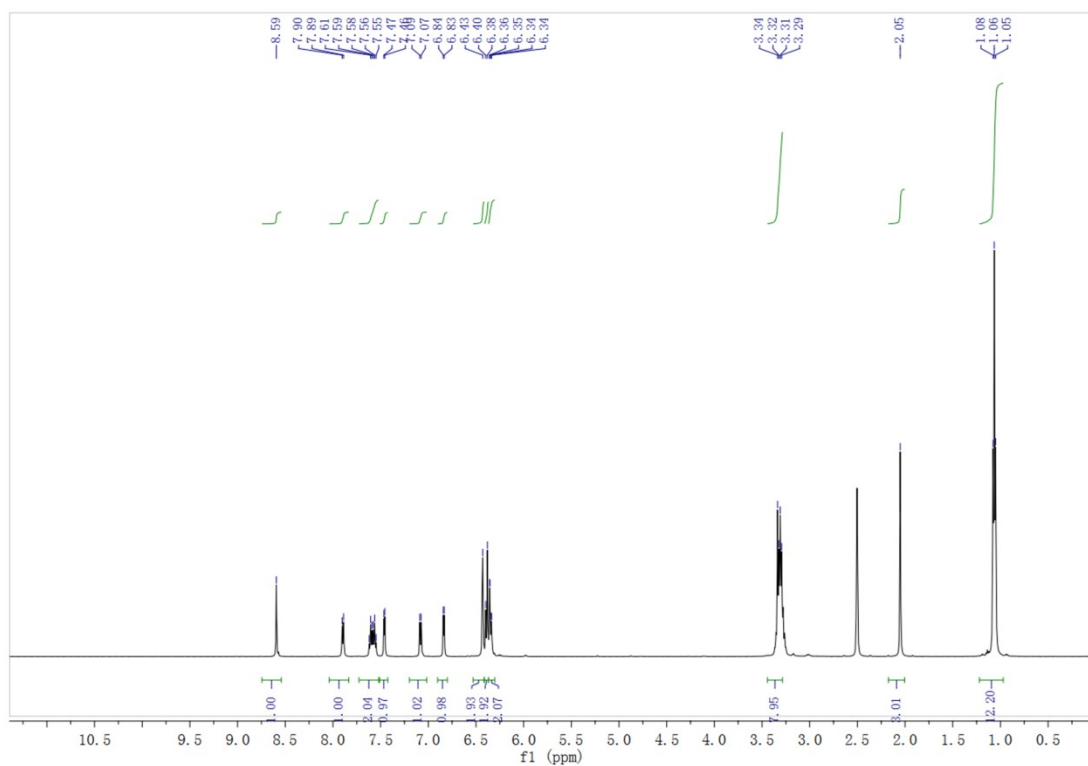

Fig. S2 The  $^1\text{H}$  NMR of probe L.

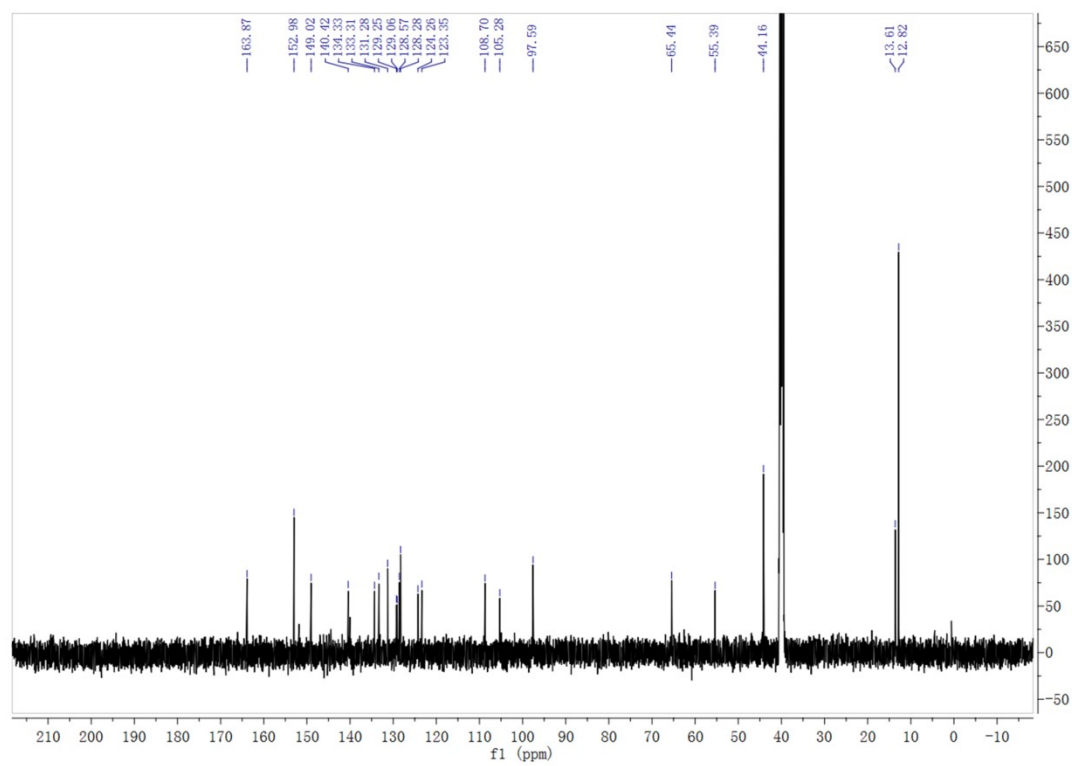

Fig. S3 The  $^{13}\text{C}$  NMR of probe L.

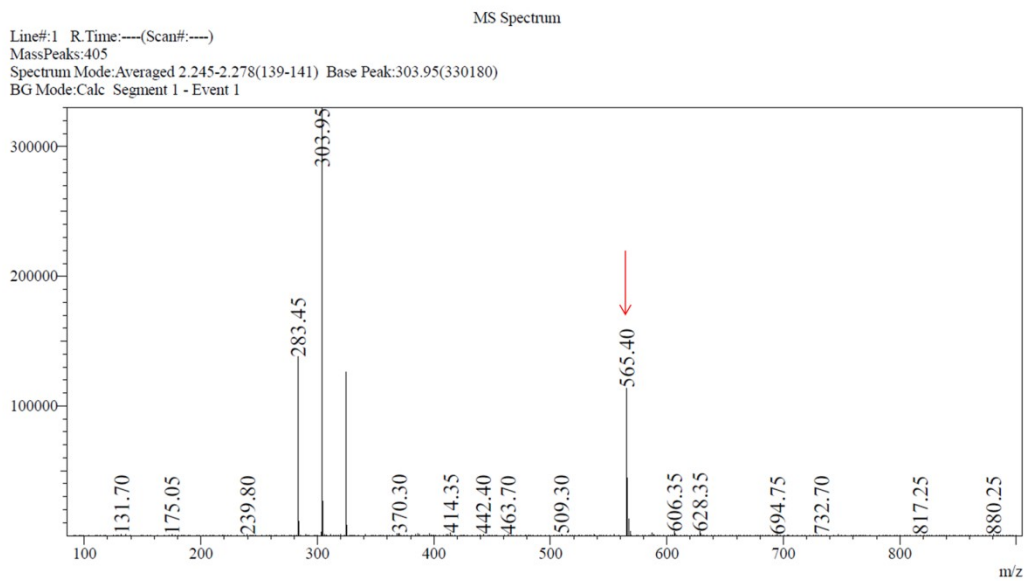

Fig. S4 The mass spectrum of probe L.

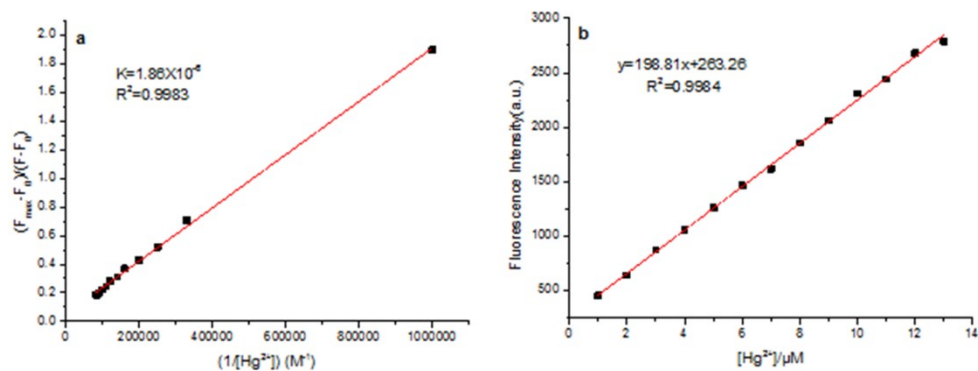

Fig. S5 Analysis for fluorescent data (a) Benesi-Hildebrand plot of L-Hg<sup>2+</sup> complexation. (b) The linear plot between fluorescence intensity and different concentration of Hg<sup>2+</sup> in CH<sub>3</sub>OH-H<sub>2</sub>O (4 :1, v/v, Tris-HCl buffer pH=8.0).

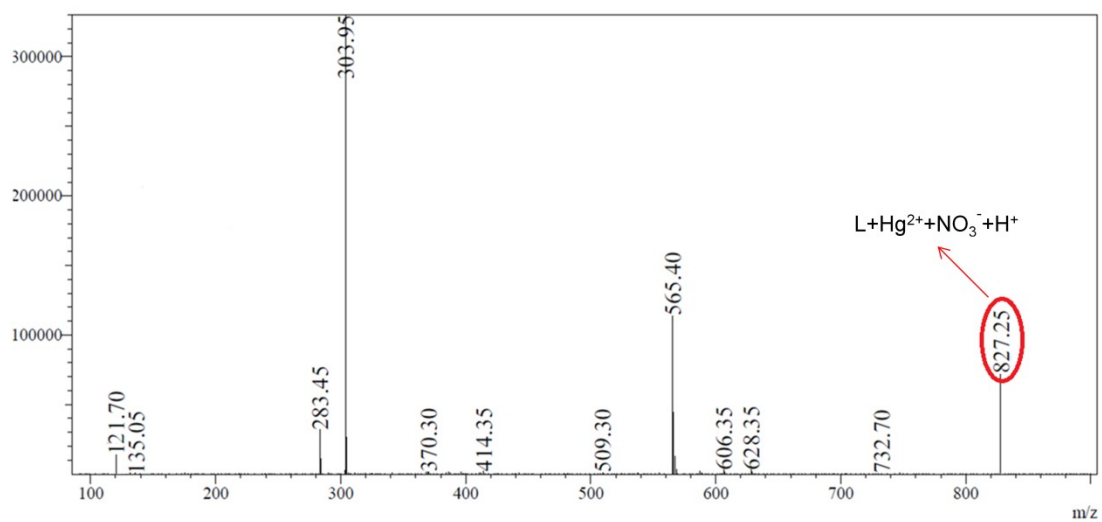

Fig. S6 Ms analysis of the L-Hg<sup>2+</sup> complex

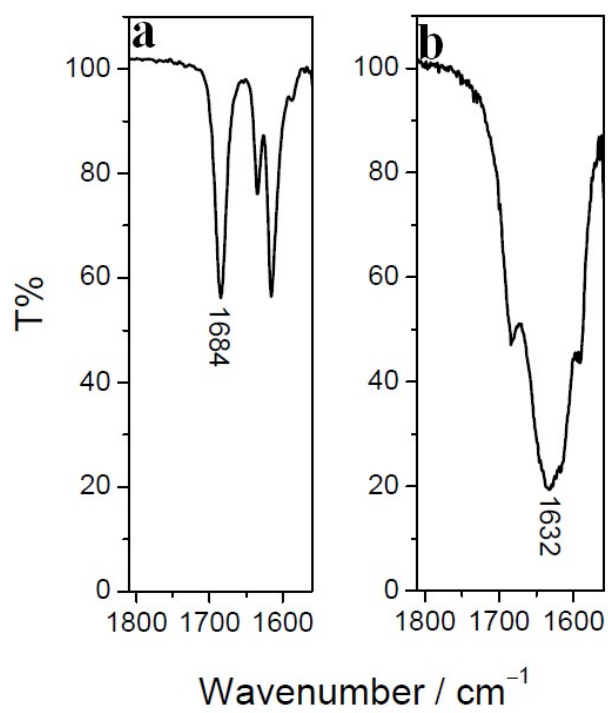

Fig. S7 (a) the IR spectrum for the C=O amide bond of probe L. (b) the IR spectrum for the C=O amide bond of probe L, when existence of 1.0 equiv. Hg<sup>2+</sup>.

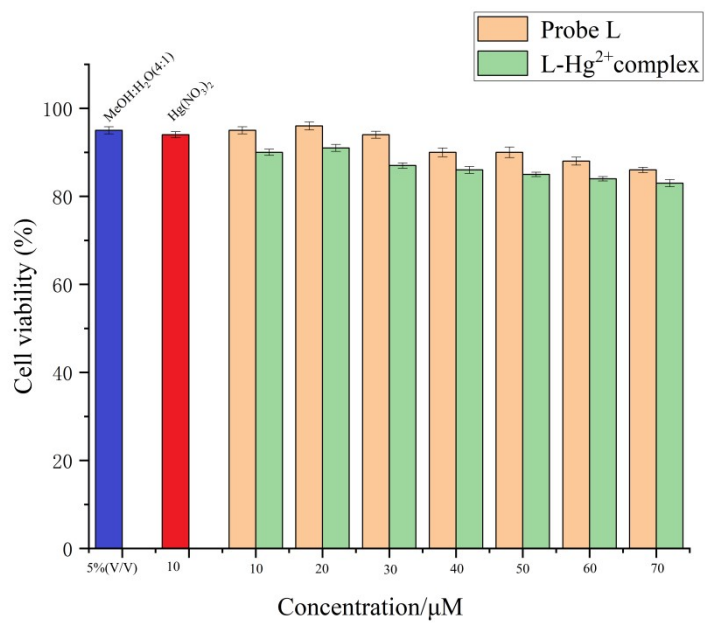

Fig. S8 MTT assay to determine the cytotoxicity of the CH<sub>3</sub>OH-H<sub>2</sub>O(4:1) solution, Hg(NO<sub>3</sub>)<sub>2</sub>, probe L and L-Hg<sup>2+</sup> complex in MCF-7 cells. MCF-7 cells were treated with 5% (v/v) CH<sub>3</sub>OH-H<sub>2</sub>O(4:1) solution, 10 μM Hg(NO<sub>3</sub>)<sub>2</sub> in CH<sub>3</sub>OH-H<sub>2</sub>O(4:1) solution, probe L and the L-Hg complex (10, 20, 30, 40, 50, 60 and 70 μM) in CH<sub>3</sub>OH-H<sub>2</sub>O(4:1) solution respectively.
